# Supplementary material for: Pain Status and Its Association with Physical Activity, Psychological Stress, and Telework among Japanese Workers with Pain during the COVID-19 Pandemic
Source: MDPI journal article supplement (doi:10.3390/ijerph18115595), 2021-05-24
Supplement: s1 [file s1]

### Supplementary Material: Table S1

**Table S1.** Details of the industry type of study participants.

| Industrial Classification                                   | All | Telework          |      |
|-------------------------------------------------------------|-----|-------------------|------|
|                                                             |     | Started/Increased |      |
|                                                             |     | <i>n</i>          | %    |
| Agriculture, forestry                                       | 18  | 3                 | 16.7 |
| Fishery                                                     | 3   | 1                 | 33.3 |
| Mining and quarrying of stone and gravel                    | 0   | 0                 | 0.0  |
| Construction                                                | 85  | 11                | 12.9 |
| Manufacturing                                               | 378 | 129               | 34.1 |
| Electricity, Gas, Heat supply and Water                     | 23  | 5                 | 21.7 |
| Information and communications                              | 101 | 69                | 68.3 |
| Transport and postal activities                             | 100 | 15                | 15.0 |
| Wholesale and Retail trade                                  | 199 | 42                | 21.1 |
| Finance and Insurance                                       | 63  | 28                | 44.4 |
| Real estate and goods rental and leasing                    | 49  | 18                | 36.7 |
| Scientific research, professional and technical services    | 57  | 20                | 35.1 |
| Accommodations, eating and drinking services                | 75  | 7                 | 9.3  |
| Living-related and personal services and amusement services | 59  | 9                 | 15.3 |
| Education, learning support                                 | 101 | 37                | 36.6 |
| Medical, health care and welfare                            | 169 | 9                 | 5.3  |
| Compound services                                           | 22  | 7                 | 31.8 |
| Services, n.e.c                                             | 241 | 67                | 27.8 |
| Government services                                         | 69  | 23                | 33.3 |
| Others (unable to classify)                                 | 129 | 21                | 16.3 |

### Supplementary Material: Table S2

**Table S2.** Association of pain augmentation with telework, physical activity, and psychological stress among workers in industries with a high rate of teleworking (n = 749).

|                      |                       | Pain Augmented | Crude |           | Adjusted * |           |
|----------------------|-----------------------|----------------|-------|-----------|------------|-----------|
|                      |                       | <i>n</i> (%)   | OR    | 95%CI     | OR         | 95%CI     |
| Telework             | Started/increased     | 66 (21.9)      | 2.40  | 1.59–3.60 | 2.22       | 1.40–3.53 |
|                      | Not started/increased | 47 (10.5)      | 1.00  |           | 1.00       |           |
| Physical activity    | Decreased             | 81 (21.2)      | 2.80  | 1.81–4.34 | 2.44       | 1.55–3.85 |
|                      | Not decreased         | 32 (8.7)       | 1.00  |           | 1.00       |           |
| Psychological stress | Increased             | 64 (18.6)      | 1.65  | 1.10–2.47 | 1.67       | 1.09–2.54 |
|                      | Not increased         | 49 (12.1)      | 1.00  |           | 1.00       |           |

OR, odds ratio; CI, confidence interval. \* Adjusted for sex, age, body mass index, marital status, education level, employment type, industry type, telework, physical activity, psychological stress.
